# Supplementary material for: Enhanced extracellular recombinant keratinase activity in Bacillus subtilis SCK6 through signal peptide optimization and site-directed mutagenesis
Source: Royal Society of Chemistry journal article supplement (doi:10.1039/c9ra07866e), 2019-01-01
Supplement: c9ra07866e1.pdf [file c9ra07866e1.pdf]

```

        10      20      30      40      50      60      70      80      90
1  ATGATGAGGAAAAGAGTTTTTGGCTTGGGATGCTGACGGCCCTTAATGCTCGTGTTCACGATGGCCTTCAGCGATTCCGGCTCTGCTGCT
1  M M R R A K K S F W L G M L T A L M L V F T M A F S D S A S A A
        100     110     120     130     140     150     160     170     180
91 CAGCCGGCGAAAATGTTGAAAAGGATTATATTGTCGGATTTAAGTCGGGAGTGAAAACCGCATCCGTCAAAAAGGACATCATCAAAGAG
31 Q P A K N V E K D Y I V G F K S G V K T A S V K K D I I K E
        190     200     210     220     230     240     250     260     270
181 AGCGCGGAAAAGTGGACAAGCAGTTTAGAATCATCAACGCGCAAAAGCGAAGCTAGACAAAAGAACGCTTGAGGAAGTCAAAAATGAT
61 S S G K V D K Q F R I I N A A K A K L D K E A L E E V K N D
        280     290     300     310     320     330     340     350     360
271 CCGGATGTCGCTTATGTGGAAGAGGATCACGTAGCTCATGCTTTGGCGCAAACCGTTCCTTACGGCATTCCCTCATTAAAGCGGACAAA
91 P D V A Y V E E D H V A H A L A Q T V P Y G I P L I K A D K
        370     380     390     400     410     420     430     440     450
361 GTGCAGGCTCAAGGCTACAAGGGAGCGAACGTAAGTCCGCGTCTCGATACAGGAATCCAAAGTCTCTCATCCGGACTTGAACGTAGTC
121 V Q A Q G Y K G A N V K V A V L D T G I Q A S H P D L N V V
        460     470     480     490     500     510     520     530     540
451 GCGGAGCAGCTTTGTGGCTGGCGAAGCTTATAACCCGACGGCAACGGACACGGCACACATGTTGCCGGTACAGTAGCTGCCGTGAC
151 G G A S F V A G E A Y N T D G N G H G T H V A G T V A A L D
        550     560     570     580     590     600     610     620     630
541 AATACACGGGTGTATTAGGCGTTGCGCCAAAGCGTATCCTTGTACGCGGTTAAAGTACTGAATTCAAGCGGAAGCGGATCATACAGCGGC
181 N T T G V L G V A P S V S L Y A V K V L N S S G S G S Y S G
        640     650     660     670     680     690     700     710     720
631 ATTGTAACGGGAATCGAGTGGGCGACAACAAACGGCATGGATGTTATCAATATGAGCCTTGGGGGAGCATCAGGCTCGACAGCGATGAAA
211 I V S G I E W A T T N G M D V I N M S L G G A S G S T A M K
        730     740     750     760     770     780     790     800     810
721 CAGGCAGTCGACAATGCATATGCAAGAGGGGTTGTCGTTGTAGCTGCAGCGGGAACAGCGGATCTTCAGGAACACGAATACAATTGGC
241 Q A V D N A Y A R G V V V V A A A G N S G S S G N T I G
        820     830     840     850     860     870     880     890     900
811 TATCCTGCGAAATACGATTCTGTATCGCTGTTGGCGGGTAGACTCTAACAGCAACAGAGCTTCATTTCCAGTGTGGGAGCAGAGCTT
271 Y P A K Y D S V I A V G A V D S N S N R A S F S S V G A E L
        910     920     930     940     950     960     970     980     990
901 GAAGTCATGGCTCCTGGCGAGCGTATACAGCACTTACCCAACGAACTTATGCAACATTGAACGGGAACGTCAATGGCTTCTCCTCAT
301 E V M A P G A G V Y S T Y P T N T Y A T L N G T S M A S P H
        1000    1010    1020    1030    1040    1050    1060    1070    1080
991 GTAGCGGGAGCAGCAGCTTTGATCTTGTCAAACATCCGAACCTTTCAGCTTCACAAGTCCGCAACCGTCTCTCCAGCAGCGGACTTAT
331 V A G A A A L I L S K H P N L S A S Q V R N R L S S T A T Y
        1090    1100    1110    1120    1130    1140
1081 TTGGGAAGTCCCTTCTACTATGGGAAGGTCTGATCAATGTCGAAGCTGCCGCTCAATAA
361 L G S S F Y Y G K G L I N V E A A A Q *
    
```

**Fig. S1** Nucleotide sequence and amino acid sequence of keratinase gene from *Bacillus* sp. LCB12.

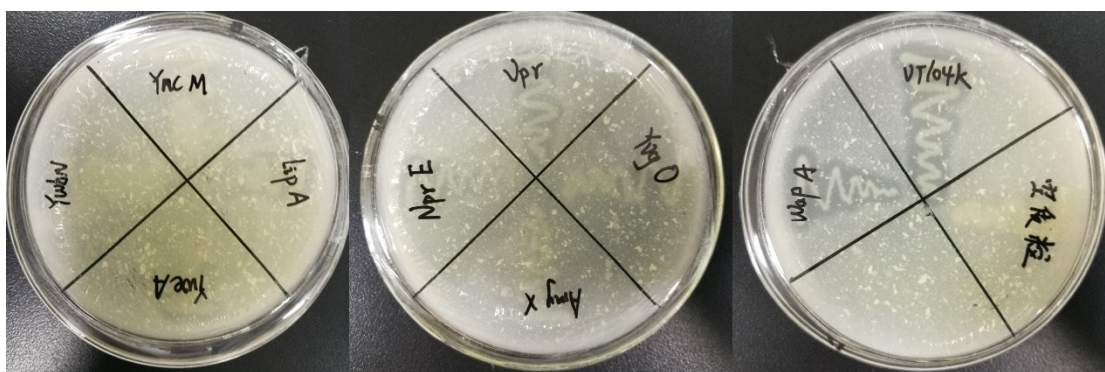

**Fig. S2** Function analysis of recombinant *B. subtilis* SCK6 with different SPs.
